# Supplementary material
Source: PubMed Central journal article supplement (PMC3488061)
Supplement: supp_M112.412635_jbc.M112.412635-1.pdf [file supp_M112.412635_jbc.M112.412635-1.pdf]

# Supplemental Figure 1

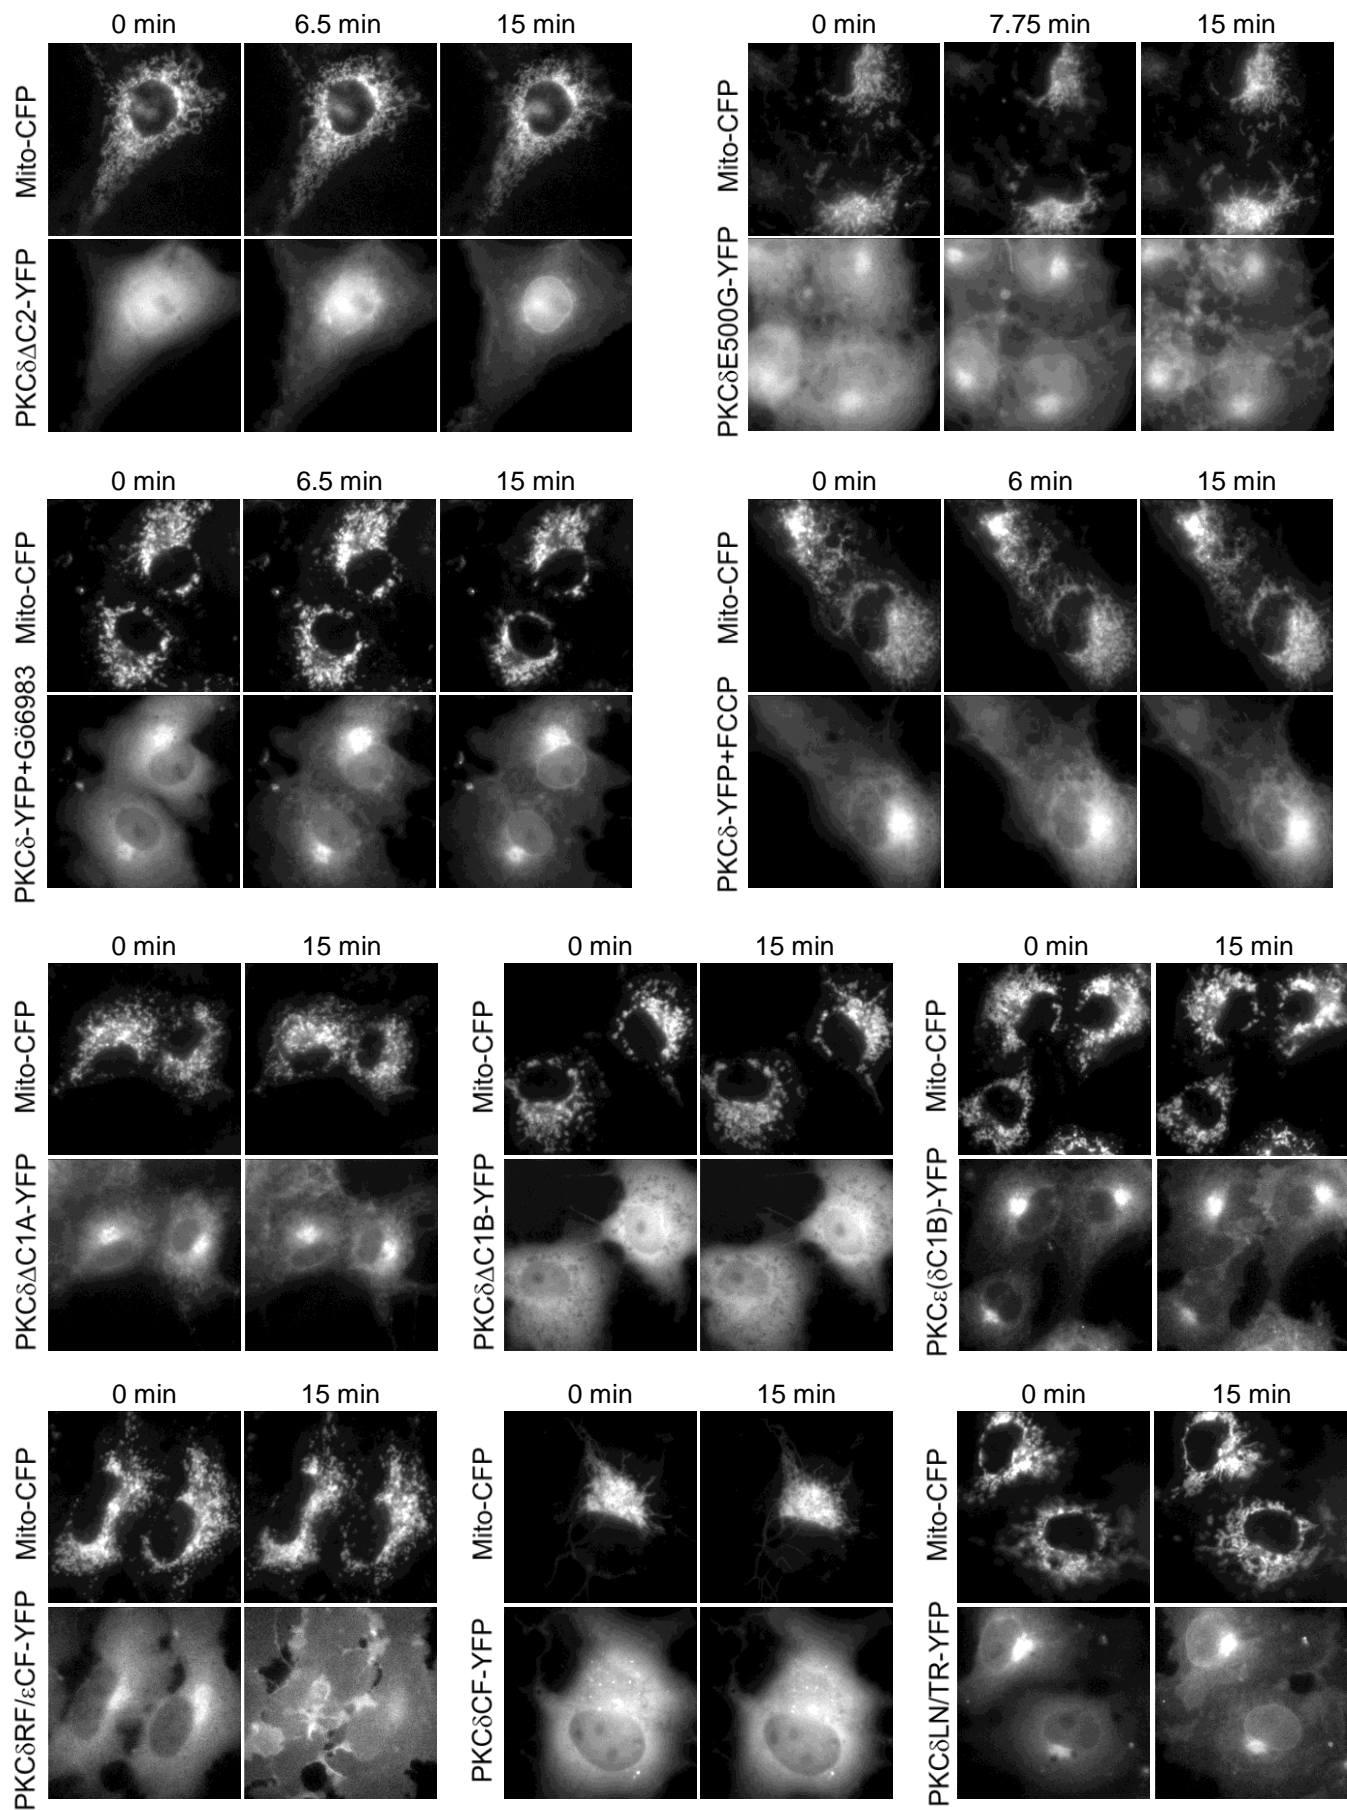

## **SUPPLEMENTAL FIGURE LEGEND**

**SUPPLEMENTAL FIGURE 1. Time-lapse images of COS-7 cells monitored for FRET ratio changes in response to PDBu stimulation.** Representative CFP- and YFP-channel images from COS-7 cells co-transfected with Mito-CFP and the indicated YFP-labeled PKC $\delta$  constructs and monitored for FRET ratio changes in response to stimulation with 200 nM PDBu. The specified times correspond to time points on the FRET ratio plots in Figures 2-4 & 7 and indicate images captured at the beginning (0 min), end (15 min), and, for some constructs, FRET ratio high points in the middle of the time-lapse series.
